# Supplementary material
Source: Springer Nature journal article supplement (https://www.springermedizin.de/resource/supplementary/12967_2013_1732_MOESM2_ESM.pdf/9575180)
Supplement: MOESM2 [file 9575180]

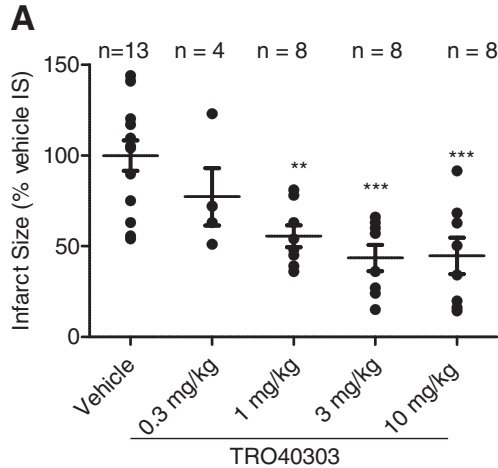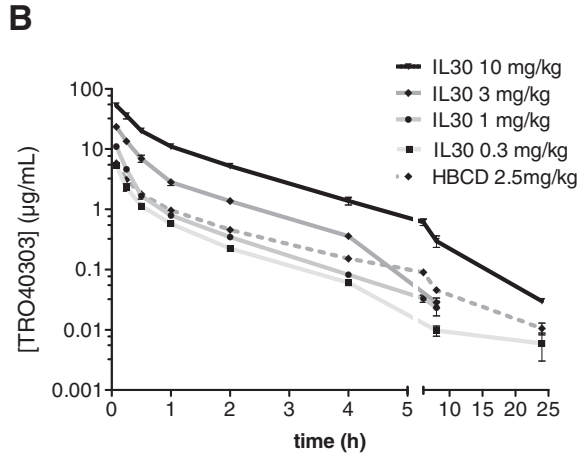

IV bolus 10 min before the beginning of reperfusion

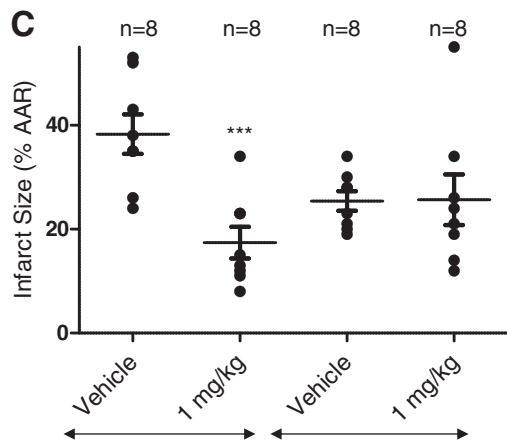

IV bolus 10 min: before ischemia   after reperfusion

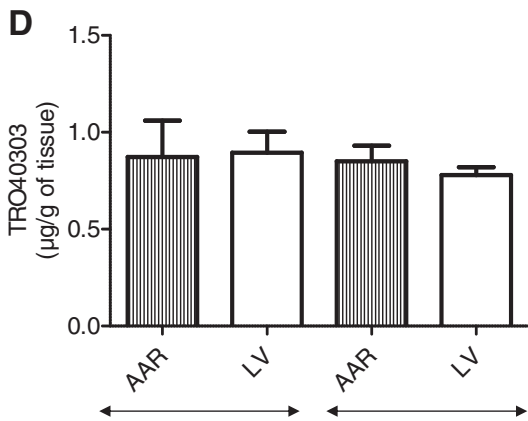

IV bolus 10 min: before ischemia   before reperfusion
